# Supplementary material for: Trends in Varicella Burden of Disease Following Introduction of Routine Childhood Varicella Vaccination in Argentina: A 12-Year Time Series Analysis
Source: MDPI journal article supplement (doi:10.3390/vaccines10071151), 2022-07-20
Supplement: s1 [file s1]

Supplementary material

Figure S1. Trends in mean incidence of varicella by age group over the study period, derived from monthly data

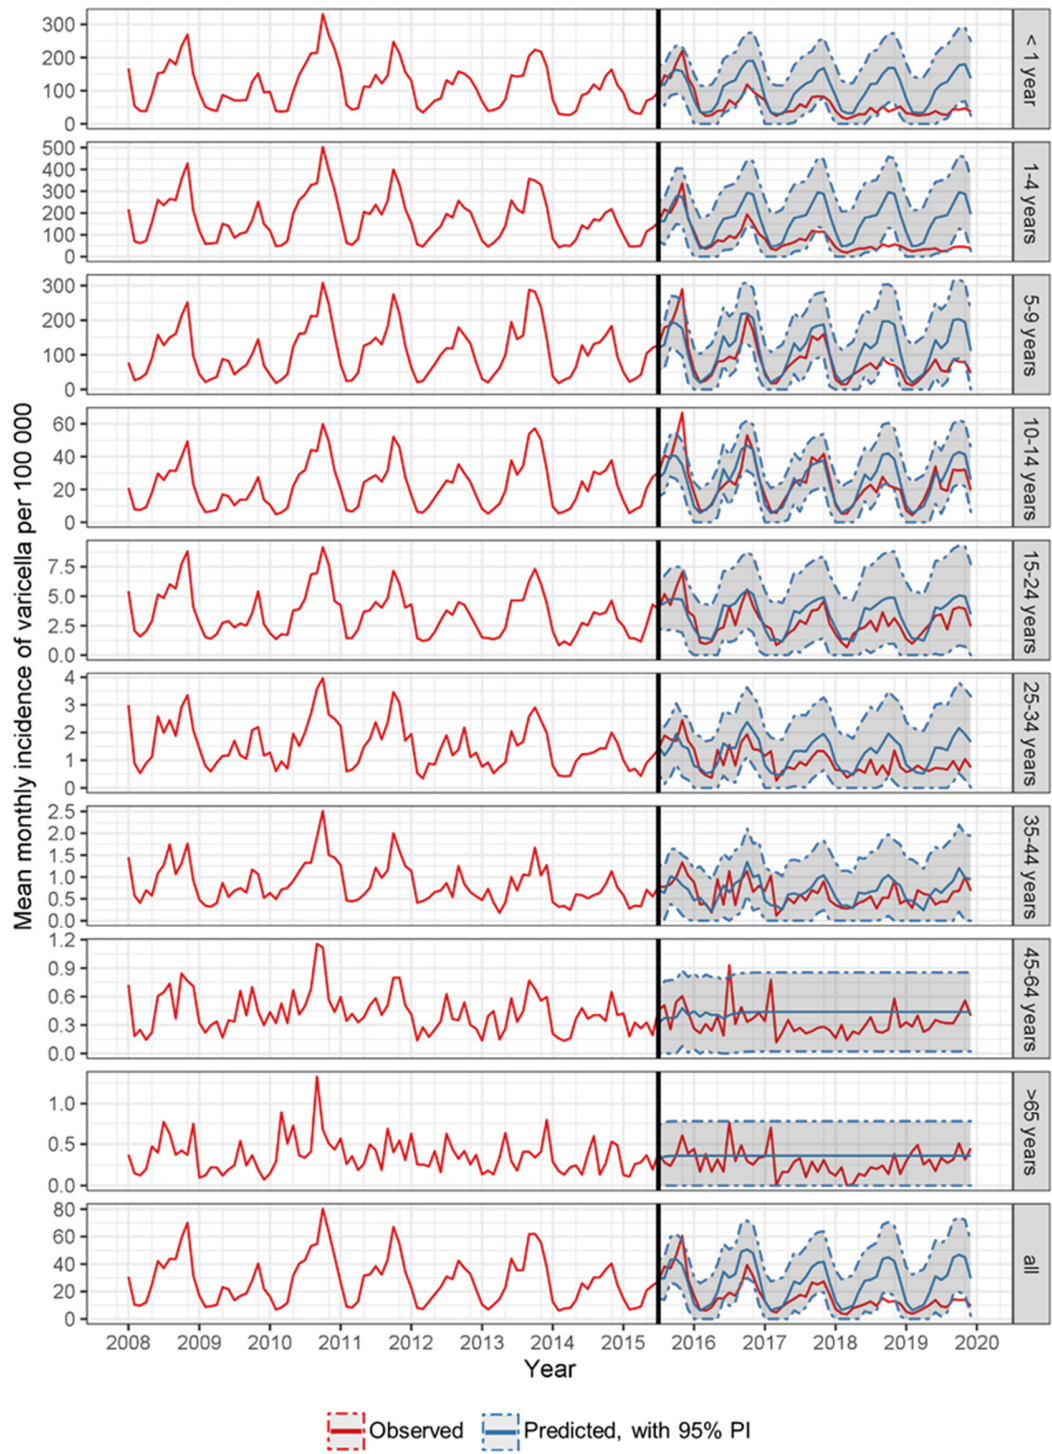

Observed, observed incidence following UVV introduction; predicted, predicted incidence without UVV introduction; PI, predicted interval; UVV, universal varicella vaccination.

Figure S2. Trends in mean annual mortality rate by age group over the study period

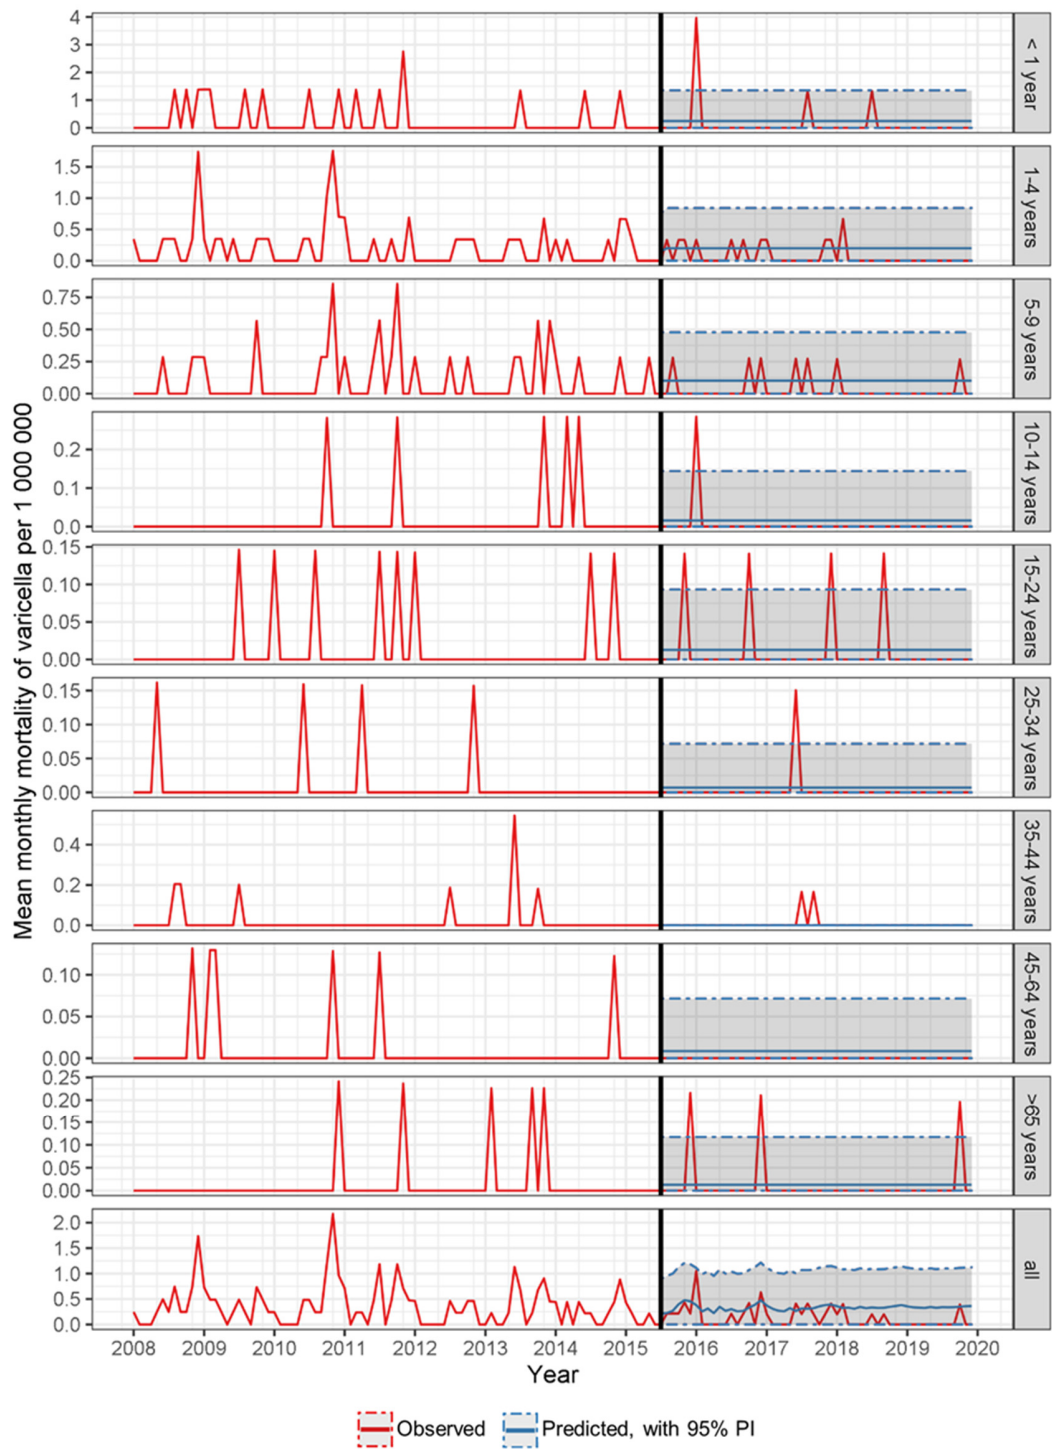

Observed, observed mortality following UVV introduction; predicted, predicted mortality without UVV introduction; PI, prediction interval; UVV, universal varicella vaccination.

**Figure S3.** Trends in mean mortality rate by age group over the study period, derived from monthly data

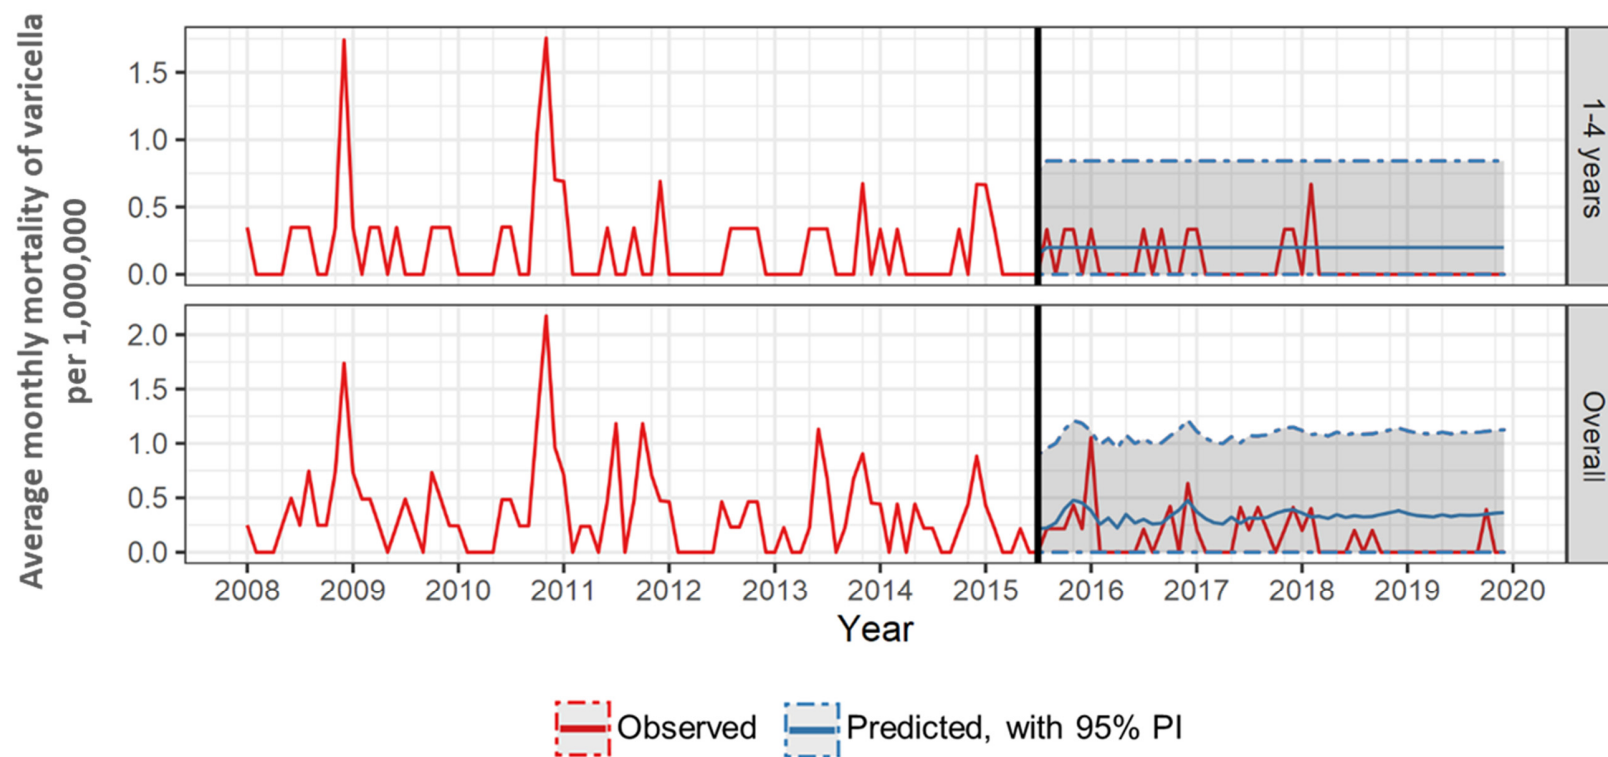

Observed, observed mortality following UVV introduction; predicted, predicted mortality without UVV introduction; PI, prediction interval; UVV, universal varicella vaccination.

**Table S1.** Percentage coverage of varicella vaccination in Argentina at the subnational level, 2015-2019

| Region              | 2015 | 2016 | 2017 | 2018  | 2019 |
|---------------------|------|------|------|-------|------|
| Buenos Aires        | 36.0 | 69.5 | 73.7 | 76.5  | 69.2 |
| Caba                | 45.7 | 71.8 | 76.0 | 93.4  | 89.9 |
| Catamarca           | 45.0 | 87.3 | 76.2 | 84.3  | 80.3 |
| Chaco               | 46.6 | 77.0 | 82.5 | 77.9  | 82.9 |
| Chubut              | 51.5 | 80.9 | 81.2 | 86.1  | 85.8 |
| Cordoba             | 52.5 | 79.6 | 85.5 | 83.5  | 82.2 |
| Corrientes          | 32.7 | 67.6 | 62.8 | 82.7  | 76.1 |
| Entre Rios          | 40.0 | 46.6 | 53.8 | 57.2  | 75.5 |
| Formosa             | 47.4 | 77.5 | 78.0 | 78.2  | 82.9 |
| Jujuy               | 80.9 | 95.4 | 89.1 | 101.8 | 94.2 |
| La Pampa            | 54.7 | 88.3 | 93.5 | 90.6  | 91.2 |
| La Rioja            | 34.1 | 72.4 | 62.5 | 73.6  | 65.8 |
| Mendoza             | 46.7 | 85.5 | 87.2 | 98.9  | 93.6 |
| Misiones            | 30.8 | 62.2 | 68.9 | 71.2  | 77.6 |
| Neuquen             | 50.5 | 83.6 | 90.9 | 98.5  | 94.8 |
| Rio Negro           | 52.2 | 81.0 | 74.5 | 77.9  | 71.9 |
| Salta               | 58.7 | 89.1 | 82.2 | 82.7  | 90.4 |
| San Juan            | 50.9 | 69.3 | 77.8 | 71.8  | 79.5 |
| San Luis            | 92.5 | 93.6 | 90.2 | 94.9  | 97.8 |
| Santa Cruz          | 38.4 | 87.7 | 83.4 | 84.5  | 86.8 |
| Santa Fe            | 55.1 | 76.5 | 76.8 | 83.7  | 76.4 |
| Santiago Del Estero | 37.0 | 61.0 | 91.5 | 85.8  | 83.7 |

| Region           | 2015 | 2016  | 2017 | 2018 | 2019 |
|------------------|------|-------|------|------|------|
| Tierra Del Fuego | 68.4 | 83.9  | 87.6 | 90.0 | 89.3 |
| Tucuman          | 70.5 | 101.1 | 82.5 | 86.9 | 82.4 |
| National         | 44.8 | 74.4  | 76.8 | 81.0 | 77.6 |

Vaccination coverage was defined as the total number of immunized children in the target population per total number of target population, based on the national census within the region and period of analysis. In some cases, the vaccination coverage exceeded 100% coverage, due to estimation errors in the population census.

**Table S2.** Varicella-related deaths by age group over the study period

| Age group<br>(years)                      | Deaths in the pre-UVV period |      |      |      |      |      |      |        | MAMR<br>Pre-UVV | Deaths in the post-UVV period |      |      |      |      | MAMR<br>Post-UVV | % Change |
|-------------------------------------------|------------------------------|------|------|------|------|------|------|--------|-----------------|-------------------------------|------|------|------|------|------------------|----------|
|                                           | 2008                         | 2009 | 2010 | 2011 | 2012 | 2013 | 2014 | 2015-I |                 | 2015                          | 2016 | 2017 | 2018 | 2019 |                  |          |
| <1                                        | 3                            | 4    | 2    | 4    | 0    | 1    | 2    | 0      | 2.7             | 0                             | 3    | 1    | 1    | 0    | 1.3              | -51.7%   |
| 1-4 (target population)                   | 10                           | 7    | 12   | 6    | 4    | 5    | 5    | 3      | 2.4             | 3                             | 4    | 3    | 2    | 0    | 1.0              | -57.7%   |
| 5-9                                       | 3                            | 3    | 5    | 8    | 3    | 6    | 3    | 1      | 1.2             | 1                             | 2    | 2    | 1    | 1    | 0.4              | -62.6%   |
| 10-14                                     | 0                            | 0    | 1    | 1    | 0    | 1    | 2    | 0      | 0.2             | 0                             | 1    | 0    | 0    | 0    | 0.1              | -67.9%   |
| 15-24                                     | 0                            | 1    | 2    | 2    | 1    | 0    | 2    | 0      | 0.1             | 1                             | 1    | 1    | 1    | 0    | 0.1              | -1.7%    |
| 25-34                                     | 1                            | 0    | 1    | 1    | 1    | 0    | 0    | 0      | 0.1             | 0                             | 0    | 1    | 0    | 0    | 0.0              | -62.2%   |
| 35-44                                     | 2                            | 1    | 0    | 0    | 1    | 4    | 0    | 0      | 0.2             | 0                             | 0    | 2    | 0    | 0    | 0.1              | -65.1%   |
| 45-64                                     | 1                            | 2    | 1    | 1    | 0    | 0    | 1    | 0      | 0.1             | 0                             | 0    | 0    | 0    | 0    | 0.0              | -100.0%  |
| ≥65                                       | 0                            | 0    | 1    | 1    | 0    | 3    | 0    | 0      | 0.1             | 1                             | 1    | 0    | 0    | 1    | 0.2              | 16.0%    |
| Non-targeted<br>(excluding 1-4 years old) | 10                           | 11   | 13   | 18   | 6    | 15   | 10   | 1      | 0.3             | 3                             | 8    | 7    | 3    | 2    | 0.1              | -53.9%   |
| All                                       | 20                           | 18   | 25   | 24   | 10   | 20   | 15   | 4      | 0.4             | 6                             | 12   | 10   | 5    | 2    | 0.2              | -55.7%   |

MAMR, Mean annual mortality rate (per 1,000,000 population); pre-UVV, pre-universal varicella vaccination; post-UVV, post-universal varicella vaccination; non-targeted population, all age groups excluding age group with 1-4 years old.

**Table S3.** Monthly observed and predicted incidence of varicella and estimated avoided cases in the target population in the post-UVV period

| Model: ARIMA(3,0,1)(0,1,1)[12] |                               |           |            |            |                         |       |      |          |
|--------------------------------|-------------------------------|-----------|------------|------------|-------------------------|-------|------|----------|
| Year-month                     | Monthly incidence (x 100,000) |           |            |            | Estimated avoided cases |       |      | % Change |
|                                | Mean Obs                      | Mean Pred | Pred – LPI | Pred – UPI | Cases avoided           | Low   | High |          |
| 2015-Jul                       | 158.148                       | 162.806   | 72.333     | 253.278    | -140                    | -2861 | 2581 | -2.9%    |
| 2015-Aug                       | 217.225                       | 163.177   | 55.020     | 271.334    | 1626                    | -1628 | 4879 | 33.1%    |
| 2015-Sep                       | 200.669                       | 225.532   | 109.656    | 341.408    | -748                    | -4233 | 2738 | -11.0%   |
| 2015-Oct                       | 250.504                       | 276.769   | 149.617    | 403.921    | -790                    | -4615 | 3035 | -9.5%    |
| 2015-Nov                       | 336.310                       | 273.768   | 143.519    | 404.018    | 1881                    | -2037 | 5799 | 22.8%    |
| 2015-Dec                       | 175.170                       | 181.015   | 45.410     | 316.620    | -176                    | -4255 | 3903 | -3.2%    |
| 2016-Jan                       | 115.184                       | 102.362   | 0.000      | 239.626    | 385                     | -3734 | 3456 | 12.5%    |
| 2016-Feb                       | 48.793                        | 38.453    | 0.000      | 178.234    | 310                     | -3884 | 1464 | 26.9%    |
| 2016-Mar                       | 35.995                        | 42.739    | 0.000      | 183.583    | -202                    | -4428 | 1080 | -15.8%   |
| 2016-Apr                       | 47.760                        | 57.825    | 0.000      | 199.875    | -302                    | -4564 | 1433 | -17.4%   |
| 2016-May                       | 74.589                        | 124.204   | 0.000      | 266.875    | -1489                   | -5769 | 2238 | -39.9%   |
| 2016-Jun                       | 69.957                        | 172.663   | 29.397     | 315.929    | -3082                   | -7380 | 1217 | -59.5%   |
| 2016-Jul                       | 94.520                        | 179.273   | 32.400     | 326.145    | -2543                   | -6950 | 1864 | -47.3%   |
| 2016-Aug                       | 84.888                        | 186.894   | 38.091     | 335.696    | -3061                   | -7525 | 1404 | -54.6%   |
| 2016-Sep                       | 121.349                       | 240.551   | 90.700     | 390.401    | -3577                   | -8073 | 920  | -49.6%   |
| 2016-Oct                       | 193.739                       | 292.586   | 141.487    | 443.685    | -2966                   | -7499 | 1568 | -33.8%   |
| 2016-Nov                       | 152.078                       | 285.644   | 134.049    | 437.240    | -4008                   | -8556 | 541  | -46.8%   |
| 2016-Dec                       | 104.285                       | 192.146   | 39.940     | 344.353    | -2636                   | -7203 | 1931 | -45.7%   |
| 2017-Jan                       | 82.390                        | 111.337   | 0.000      | 263.722    | -867                    | -5430 | 2467 | -26.0%   |

| Model: ARIMA(3,0,1)(0,1,1)[12] |                               |                |                |                |                         |                |             |               |
|--------------------------------|-------------------------------|----------------|----------------|----------------|-------------------------|----------------|-------------|---------------|
| Year-month                     | Monthly incidence (x 100,000) |                |                |                | Estimated avoided cases |                |             | % Change      |
|                                | Mean Obs                      | Mean Pred      | Pred – LPI     | Pred – UPI     | Cases avoided           | Low            | High        |               |
| 2017-Feb                       | 36.703                        | 46.470         | 0.000          | 199.184        | -292                    | -4865          | 1099        | -21.0%        |
| 2017-Mar                       | 30.959                        | 49.407         | 0.000          | 202.290        | -552                    | -5130          | 927         | -37.3%        |
| 2017-Apr                       | 50.496                        | 63.657         | 0.000          | 216.704        | -394                    | -4977          | 1512        | -20.7%        |
| 2017-May                       | 56.775                        | 129.124        | 0.000          | 282.266        | -2166                   | -6752          | 1700        | -56.0%        |
| 2017-Jun                       | 66.360                        | 176.923        | 23.702         | 330.145        | -3311                   | -7898          | 1277        | -62.5%        |
| 2017-Jul                       | 81.789                        | 182.893        | 27.423         | 338.362        | -3027                   | -7683          | 1628        | -55.3%        |
| 2017-Aug                       | 74.943                        | 190.013        | 33.488         | 346.538        | -3446                   | -8132          | 1241        | -60.6%        |
| 2017-Sep                       | 118.525                       | 243.210        | 86.135         | 400.286        | -3,733                  | -8,437         | 970         | -51.3%        |
| <b>2017-Oct</b>                | <b>113.950</b>                | <b>294.872</b> | <b>137.064</b> | <b>452.679</b> | <b>-5,417</b>           | <b>-10,143</b> | <b>-692</b> | <b>-61.4%</b> |
| <b>2017-Nov</b>                | <b>114.752</b>                | <b>287.597</b> | <b>129.546</b> | <b>445.647</b> | <b>-5,175</b>           | <b>-9,908</b>  | <b>-443</b> | <b>-60.1%</b> |
| 2017-Dec                       | 81.422                        | 193.822        | 35.425         | 352.219        | -3,366                  | -8,108         | 1,377       | -58.0%        |
| 2018-Jan                       | 42.831                        | 112.770        | 0.000          | 271.206        | -2,090                  | -6,825         | 1,280       | -62.0%        |
| 2018-Feb                       | 23.524                        | 47.699         | 0.000          | 206.328        | -722                    | -5,463         | 703         | -50.7%        |
| 2018-Mar                       | 18.571                        | 50.458         | 0.000          | 209.179        | -953                    | -5,696         | 555         | -63.2%        |
| 2018-Apr                       | 28.610                        | 64.558         | 0.000          | 223.372        | -1,074                  | -5,820         | 855         | -55.7%        |
| 2018-May                       | 36.909                        | 129.896        | 0.000          | 288.761        | -2,779                  | -7,527         | 1,103       | -71.6%        |
| 2018-Jun                       | 37.243                        | 177.584        | 18.676         | 336.493        | -4,194                  | -8,943         | 555         | -79.0%        |
| 2018-Jul                       | 44.906                        | 183.459        | 22.540         | 344.377        | -4,141                  | -8,950         | 668         | -75.5%        |
| 2018-Aug                       | 31.120                        | 190.498        | 28.654         | 352.342        | -4,763                  | -9,600         | 74          | -83.7%        |
| <b>2018-Sep</b>                | <b>56.785</b>                 | <b>243.625</b> | <b>81.307</b>  | <b>405.944</b> | <b>-5,584</b>           | <b>-10,434</b> | <b>-733</b> | <b>-76.7%</b> |



| Model: ARIMA(3,0,1)(0,1,1)[12] |                               |           |            |            |                         |         |        |          |
|--------------------------------|-------------------------------|-----------|------------|------------|-------------------------|---------|--------|----------|
| Year-month                     | Monthly incidence (x 100,000) |           |            |            | Estimated avoided cases |         |        | % Change |
|                                | Mean Obs                      | Mean Pred | Pred – LPI | Pred – UPI | Cases avoided           | Low     | High   |          |
| 2018-Oct                       | 47.014                        | 295.227   | 132.258    | 458.196    | -7,418                  | -12,288 | -2,547 | -84.1%   |
| 2018-Nov                       | 56.049                        | 287.901   | 124.727    | 451.076    | -6,929                  | -11,805 | -2,052 | -80.5%   |
| 2018-Dec                       | 49.892                        | 194.083   | 30.604     | 357.561    | -4,309                  | -9,195  | 576    | -74.3%   |
| 2019-Jan                       | 34.412                        | 112.993   | 0.000      | 276.493    | -2,343                  | -7,218  | 1,026  | -69.5%   |
| 2019-Feb                       | 24.652                        | 47.890    | 0.000      | 211.562    | -693                    | -5,573  | 735    | -48.5%   |
| 2019-Mar                       | 29.147                        | 50.622    | 0.000      | 214.373    | -640                    | -5,522  | 869    | -42.4%   |
| 2019-Apr                       | 33.172                        | 64.698    | 0.000      | 228.532    | -940                    | -5,825  | 989    | -48.7%   |
| 2019-May                       | 34.345                        | 130.016   | 0.000      | 293.894    | -2,852                  | -7,738  | 1,024  | -73.6%   |
| 2019-Jun                       | 37.699                        | 177.687   | 13.772     | 341.602    | -4,174                  | -9,061  | 713    | -78.8%   |
| 2019-Jul                       | 24.283                        | 183.547   | 17.706     | 349.387    | -4,748                  | -9,693  | 196    | -86.8%   |
| 2019-Aug                       | 27.168                        | 190.573   | 23.848     | 357.299    | -4,872                  | -9,843  | 99     | -85.7%   |
| 2019-Sep                       | 43.267                        | 243.690   | 76.513     | 410.867    | -5,976                  | -10,960 | -991   | -82.2%   |
| 2019-Oct                       | 45.280                        | 295.283   | 127.482    | 463.083    | -7,454                  | -12,457 | -2,451 | -84.7%   |
| 2019-Nov                       | 44.743                        | 287.949   | 119.953    | 455.944    | -7,251                  | -12,260 | -2,242 | -84.5%   |
| 2019-Dec                       | 38.169                        | 194.123   | 25.837     | 362.410    | -4,650                  | -9,667  | 368    | -80.3%   |
| Averted                        |                               |           |            |            | 51,203                  |         |        |          |

Blue, highlighted rows signify months where observed incidences following UVV introduction were significantly lower than predicted incidences without UVV introduction.

Apr, April; ARIMA, Autoregressive Integrated Moving Average; Aug, August; Dec, December; Feb, February; Jan, January; Jul, July; Jun, June; LPI: lower prediction interval; Mar, March; Mean Obs, mean observed; Mean Pred: mean predicted; Nov, November; Oct, October; Sept, September; UPI, upper prediction interval; UVV, universal varicella vaccination.

**Table S4.** Monthly observed and predicted incidence of varicella and estimated avoided cases in the overall population in the post-UVV period

| Model: ARIMA(3,0,1)(2,1,0)[12] |                               |               |               |               |                         |                |               |               |
|--------------------------------|-------------------------------|---------------|---------------|---------------|-------------------------|----------------|---------------|---------------|
| Year-month                     | Monthly incidence (x 100,000) |               |               |               | Estimated avoided cases |                |               | % Change      |
|                                | Mean obs                      | Mean Pred     | Pred – LPI    | Pred – UPI    | Cases avoided           | Lower          | Upper         |               |
| 2015-Jul                       | 27.467                        | 29.010        | 14.900        | 43.120        | -666                    | -6,752         | 5,420         | -5.3%         |
| 2015-Aug                       | 38.197                        | 29.748        | 13.826        | 45.670        | 3,644                   | -3,223         | 10,512        | 28.4%         |
| 2015-Sep                       | 36.827                        | 43.168        | 26.481        | 59.855        | -2,735                  | -9,933         | 4,462         | -14.7%        |
| 2015-Oct                       | 46.476                        | 43.460        | 25.000        | 61.920        | 1,301                   | -6,661         | 9,263         | 6.9%          |
| 2015-Nov                       | 60.554                        | 39.165        | 20.534        | 57.797        | 9,225                   | 1,189          | 17,261        | 54.6%         |
| 2015-Dec                       | 28.992                        | 26.336        | 6.902         | 45.769        | 1,146                   | -7,236         | 9,528         | 10.1%         |
| 2016-Jan                       | 17.135                        | 10.938        | 0.000         | 30.509        | 2,701                   | -5,830         | 7,469         | 56.7%         |
| 2016-Feb                       | 6.740                         | 6.188         | 0.000         | 26.024        | 241                     | -8,406         | 2,938         | 8.9%          |
| 2016-Mar                       | 6.050                         | 8.443         | 0.000         | 28.403        | -1,044                  | -9,744         | 2,637         | -28.4%        |
| 2016-Apr                       | 8.564                         | 11.110        | 0.000         | 31.156        | -1,110                  | -9,848         | 3,733         | -22.9%        |
| 2016-May                       | 14.992                        | 19.636        | 0.000         | 39.763        | -2,024                  | -10,798        | 6,535         | -23.6%        |
| 2016-Jun                       | 14.921                        | 34.491        | 14.328        | 54.655        | -8,531                  | -17,320        | 259           | -56.7%        |
| 2016-Jul                       | 19.231                        | 30.070        | 9.473         | 50.667        | -4,725                  | -13,703        | 4,254         | -36.0%        |
| 2016-Aug                       | 16.990                        | 32.738        | 12.000        | 53.476        | -6,864                  | -15,904        | 2,175         | -48.1%        |
| <b>2016-Sep</b>                | <b>25.033</b>                 | <b>48.960</b> | <b>28.136</b> | <b>69.784</b> | <b>-10,430</b>          | <b>-19,507</b> | <b>-1,353</b> | <b>-48.9%</b> |
| 2016-Oct                       | 39.410                        | 50.673        | 29.722        | 71.624        | -4,909                  | -14,042        | 4,223         | -22.2%        |
| 2016-Nov                       | 31.229                        | 47.901        | 26.922        | 68.881        | -7,267                  | -16,412        | 1,878         | -34.8%        |
| 2016-Dec                       | 20.202                        | 31.651        | 10.608        | 52.694        | -4,991                  | -14,163        | 4,182         | -36.2%        |
| 2017-Jan                       | 13.150                        | 12.719        | 0.000         | 33.780        | 190                     | -9,086         | 5,792         | 3.4%          |

| Model: ARIMA(3,0,1)(2,1,0)[12] |                               |               |               |               |                         |                |               |               |
|--------------------------------|-------------------------------|---------------|---------------|---------------|-------------------------|----------------|---------------|---------------|
| Year-month                     | Monthly incidence (x 100,000) |               |               |               | Estimated avoided cases |                |               | % Change      |
|                                | Mean obs                      | Mean Pred     | Pred – LPI    | Pred – UPI    | Cases avoided           | Lower          | Upper         |               |
| 2017-Feb                       | 6.089                         | 6.272         | 0.000         | 27.358        | -81                     | -9,368         | 2,682         | -2.9%         |
| 2017-Mar                       | 4.741                         | 7.726         | 0.000         | 28.824        | -1,315                  | -10,608        | 2,088         | -38.6%        |
| 2017-Apr                       | 8.955                         | 8.919         | 0.000         | 30.027        | 16                      | -9,281         | 3,944         | 0.4%          |
| 2017-May                       | 12.151                        | 16.965        | 0.000         | 38.081        | -2,120                  | -11,421        | 5,352         | -28.4%        |
| 2017-Jun                       | 14.719                        | 27.275        | 6.155         | 48.395        | -5,530                  | -14,832        | 3,772         | -46.0%        |
| 2017-Jul                       | 17.543                        | 25.558        | 3.860         | 47.257        | -3,530                  | -13,087        | 6,027         | -31.4%        |
| 2017-Aug                       | 16.327                        | 30.633        | 8.768         | 52.498        | -6,301                  | -15,932        | 3,329         | -46.7%        |
| 2017-Sep                       | 26.571                        | 37.785        | 15.838        | 59.732        | -4,939                  | -14,606        | 4,727         | -29.7%        |
| 2017-Oct                       | 25.208                        | 41.056        | 18.933        | 63.178        | -6,980                  | -16,724        | 2,764         | -38.6%        |
| 2017-Nov                       | 27.284                        | 41.621        | 19.476        | 63.766        | -6,315                  | -16,069        | 3,439         | -34.4%        |
| 2017-Dec                       | 18.054                        | 26.724        | 4.493         | 48.955        | -3,818                  | -13,610        | 5,973         | -32.4%        |
| 2018-Jan                       | 7.333                         | 13.288        | 0.000         | 35.536        | -2,649                  | -12,549        | 3,263         | -44.8%        |
| 2018-Feb                       | 3.983                         | 6.606         | 0.000         | 28.884        | -1,167                  | -11,080        | 1,772         | -39.7%        |
| 2018-Mar                       | 3.468                         | 7.881         | 0.000         | 30.175        | -1,964                  | -11,883        | 1,543         | -56.0%        |
| 2018-Apr                       | 7.886                         | 9.590         | 0.000         | 31.894        | -758                    | -10,682        | 3,509         | -17.8%        |
| 2018-May                       | 9.228                         | 19.750        | 0.000         | 42.063        | -4,682                  | -14,610        | 4,106         | -53.3%        |
| 2018-Jun                       | 10.747                        | 27.835        | 5.517         | 50.153        | -7,603                  | -17,533        | 2,327         | -61.4%        |
| 2018-Jul                       | 12.795                        | 28.591        | 4.353         | 52.828        | -7,028                  | -17,813        | 3,756         | -55.2%        |
| 2018-Aug                       | 9.579                         | 30.768        | 6.015         | 55.522        | -9,428                  | -20,442        | 1,586         | -68.9%        |
| <b>2018-Sep</b>                | <b>15.269</b>                 | <b>43.681</b> | <b>18.682</b> | <b>68.680</b> | <b>-12,642</b>          | <b>-23,765</b> | <b>-1,518</b> | <b>-65.0%</b> |

| Model: ARIMA(3,0,1)(2,1,0)[12] |                               |           |            |            |                         |         |        |          |
|--------------------------------|-------------------------------|-----------|------------|------------|-------------------------|---------|--------|----------|
| Year-month                     | Monthly incidence (x 100,000) |           |            |            | Estimated avoided cases |         |        | % Change |
|                                | Mean obs                      | Mean Pred | Pred – LPI | Pred – UPI | Cases avoided           | Lower   | Upper  |          |
| 2018-Oct                       | 12.442                        | 44.989    | 19.439     | 70.538     | -14,481                 | -25,849 | -3,113 | -72.3%   |
| 2018-Nov                       | 13.035                        | 42.127    | 16.513     | 67.741     | -12,944                 | -24,341 | -1,548 | -69.1%   |
| 2018-Dec                       | 11.177                        | 27.909    | 2.029      | 53.788     | -7,445                  | -18,960 | 4,070  | -60.0%   |
| 2019-Jan                       | 5.414                         | 11.923    | 0.000      | 37.853     | -2,925                  | -14,578 | 2,433  | -54.6%   |
| 2019-Feb                       | 3.827                         | 6.297     | 0.000      | 32.319     | -1,110                  | -12,804 | 1,720  | -39.2%   |
| 2019-Mar                       | 5.456                         | 8.125     | 0.000      | 34.191     | -1,199                  | -12,913 | 2,452  | -32.8%   |
| 2019-Apr                       | 7.702                         | 10.179    | 0.000      | 36.277     | -1,113                  | -12,841 | 3,461  | -24.3%   |
| 2019-May                       | 10.192                        | 18.908    | 0.000      | 45.034     | -3,917                  | -15,658 | 4,580  | -46.1%   |
| 2019-Jun                       | 13.817                        | 31.086    | 4.946      | 57.225     | -7,761                  | -19,507 | 3,986  | -55.6%   |
| 2019-Jul                       | 9.112                         | 28.495    | 1.782      | 55.209     | -8,710                  | -20,715 | 3,294  | -68.0%   |
| 2019-Aug                       | 8.654                         | 31.738    | 4.853      | 58.624     | -10,374                 | -22,456 | 1,708  | -72.7%   |
| 2019-Sep                       | 14.295                        | 44.727    | 17.749     | 71.704     | -13,676                 | -25,799 | -1,552 | -68.0%   |
| 2019-Oct                       | 13.843                        | 46.794    | 19.644     | 73.943     | -14,807                 | -27,008 | -2,607 | -70.4%   |
| 2019-Nov                       | 13.997                        | 44.942    | 17.765     | 72.118     | -13,906                 | -26,119 | -1,693 | -68.9%   |
| 2019-Dec                       | 9.379                         | 29.492    | 2.230      | 56.753     | -9,038                  | -21,289 | 3,213  | -68.2%   |
| Averted                        |                               |           |            |            | 92,886                  |         |        |          |

Blue, highlighted rows signify months where observed incidences following UVV introduction were significantly lower than predicted incidences without UVV introduction.

Apr, April; ARIMA, Autoregressive Integrated Moving Average; Aug, August; Dec, December; Feb, February; Jan, January; Jul, July; Jun, June; LPI: lower prediction interval; Mar, March; Mean Obs, mean observed; Mean Pred: mean predicted; Nov, November; Oct, October; Sept, September; UPI, upper prediction interval; UVV, universal varicella vaccination.

**Table S5.** Number of observed, predicted, and avoided varicella cases in the target and overall populations post-UVV introduction, considering all months or only months with significant differences

|                    |          |           | Avoided cases          |          |         |                                                      |          |         |
|--------------------|----------|-----------|------------------------|----------|---------|------------------------------------------------------|----------|---------|
|                    |          |           | Considering all months |          |         | Considering only months with significant differences |          |         |
|                    | Observed | Predicted | Mean avoided cases     | Lower    | Upper   | Mean avoided cases                                   | Lower    | Upper   |
| Target population  | 128,328  | 273,139   | -144,811               | -391,017 | 56,484  | -51,203                                              | -90,254  | -12,152 |
| Overall population | 387,046  | 636,136   | -249,090               | -784,111 | 186,013 | -92,886                                              | -172,388 | -13,385 |

Observed, observed incidence following UVV introduction; predicted, predicted cases without UVV introduction; UVV, universal varicella vaccination.

**Table S6.** Ratios between average incidences in peak versus non-peak periods and highest three versus lowest three incidence months in the target and overall populations, by year

| Year                                                      | Target population | Overall population |
|-----------------------------------------------------------|-------------------|--------------------|
| <b>Peak period versus non-peak period</b>                 |                   |                    |
| 2015                                                      | 1.4               | 1.5                |
| 2016                                                      | 2.1               | 2.3                |
| 2017                                                      | 1.9               | 2.1                |
| 2018                                                      | 1.5               | 1.6                |
| 2019                                                      | 1.4               | 1.7                |
| <b>Highest three versus lowest three incidence months</b> |                   |                    |
| 2015                                                      | 5.4               | 6.1                |
| 2016                                                      | 3.5               | 4.5                |
| 2017                                                      | 2.9               | 4.0                |
| 2018                                                      | 2.3               | 2.7                |
| 2019                                                      | 1.5               | 2.5                |

Highest three incidence months, September to November; lowest three incidence months, February to April; target population, children aged 1–4 years.
